# Supplementary material for: The Gut Microbiota Profile in Children with Prader–Willi Syndrome
Source: MDPI journal article supplement (doi:10.3390/genes11080904), 2020-08-07
Supplement: s1 [file s1]

SUPPLEMENTARY FIGURES AND TABLES

**Figure S1:** Importance of predictors. Importance of the identified taxa in models for (A) differentially abundant bacterial genera: PWS vs. CON, (B) differentially abundant bacterial genera: OWOB CON vs. NW CON, (C) differentially abundant bacterial genera: OWOB PWS vs. NW PWS, (D) differentially abundant fungal genera: PWS vs. CON, (E) differentially abundant fungal genera: OWOB CON vs. NW CON, (F) differentially abundant fungal genera: OWOB PWS vs. NW PWS, (G) predicting PWS using selected bacterial and fungal genera markers, (H) predicting OWOB in CON subjects using selected bacterial and fungal genera markers, (I) predicting OWOB in PWS subjects using bacterial and fungal genera markers. Predictors with grey labels in A-F were those with importance between the 80% and 90% quantile in each model and were not included in the final models.

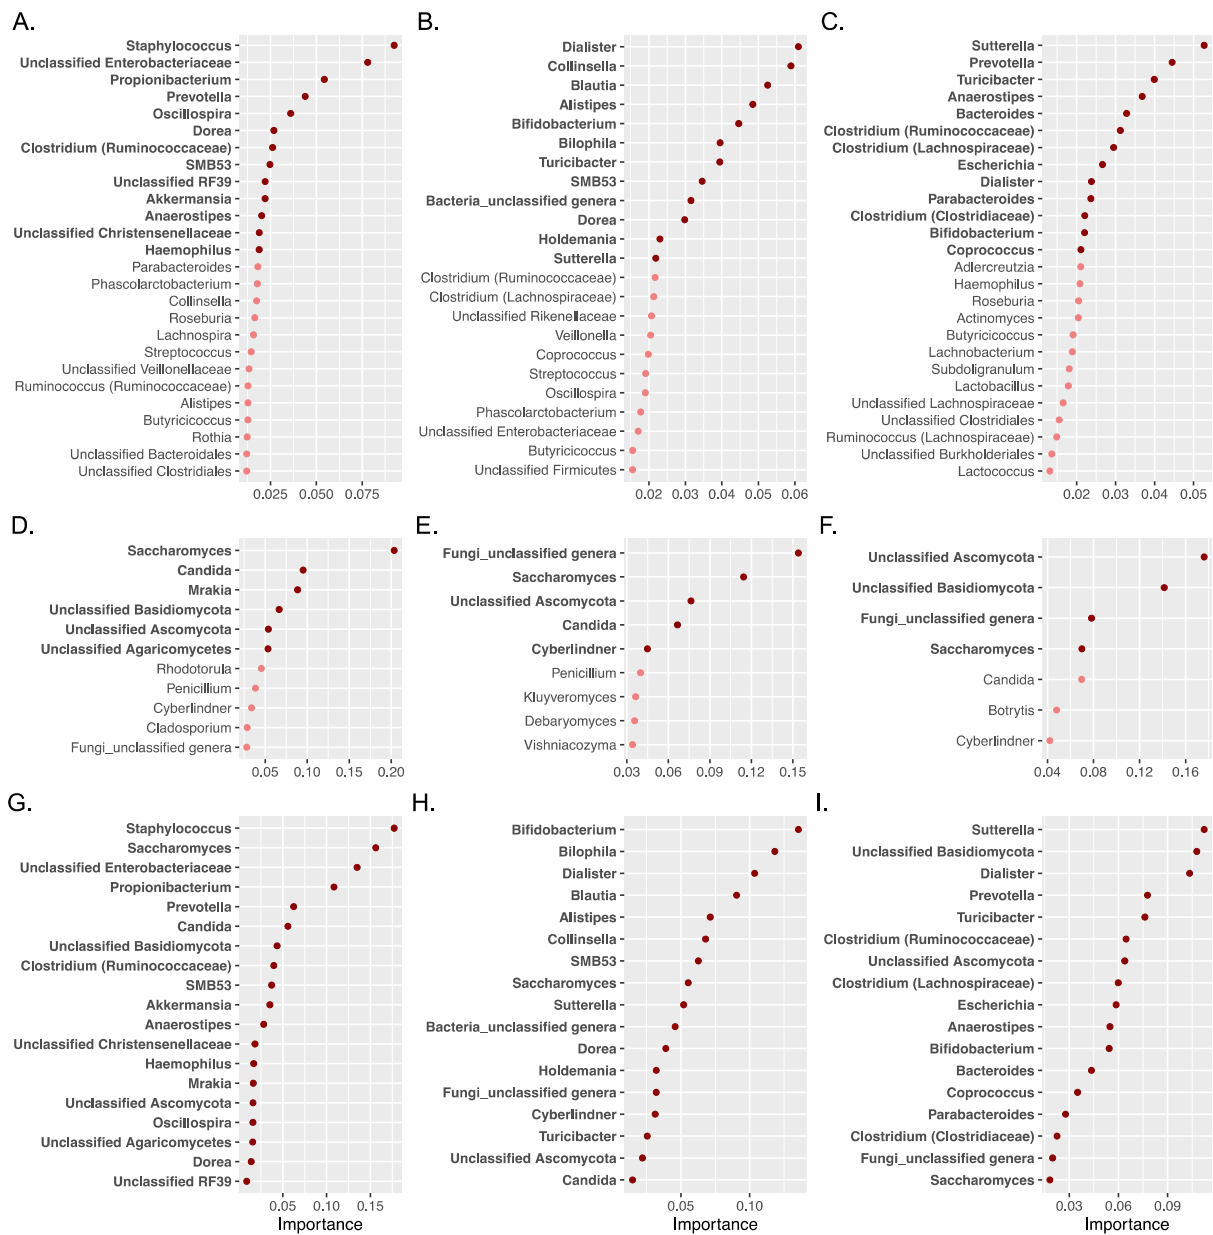

**Figure S2:** Performance of the model for differentiating PWS from CON using bacterial genera markers.

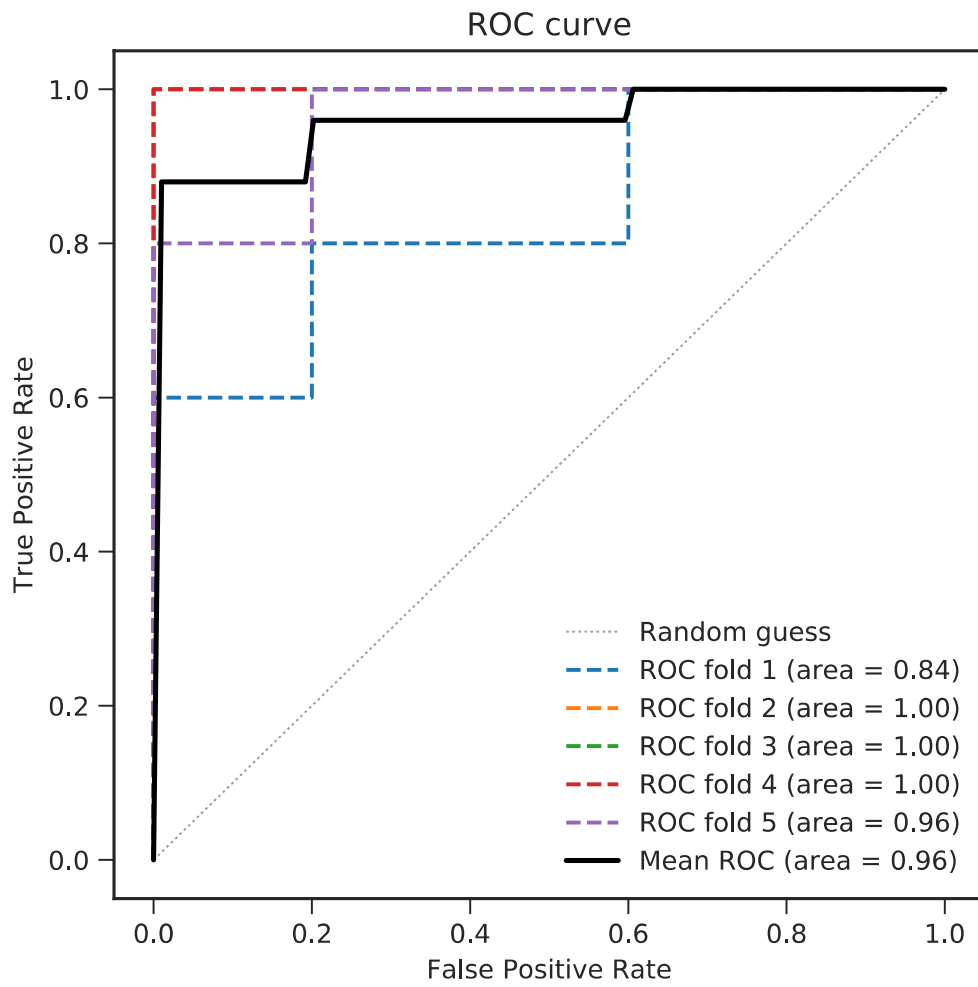

**Figure S3:** Performance of the model for differentiating OWOB CON from NW CON using bacterial genera markers.

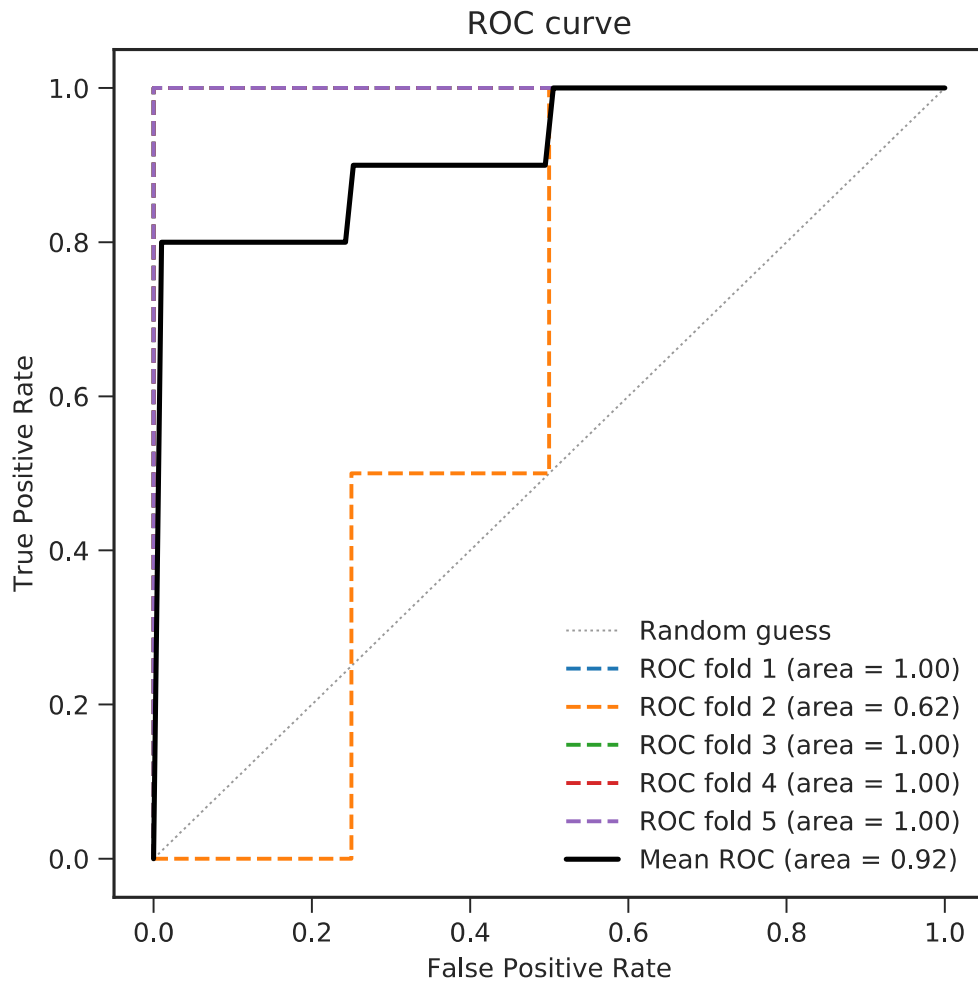

**Figure S4:** Performance of the model for differentiating OWOB PWS from NW PWS using bacterial genera markers.

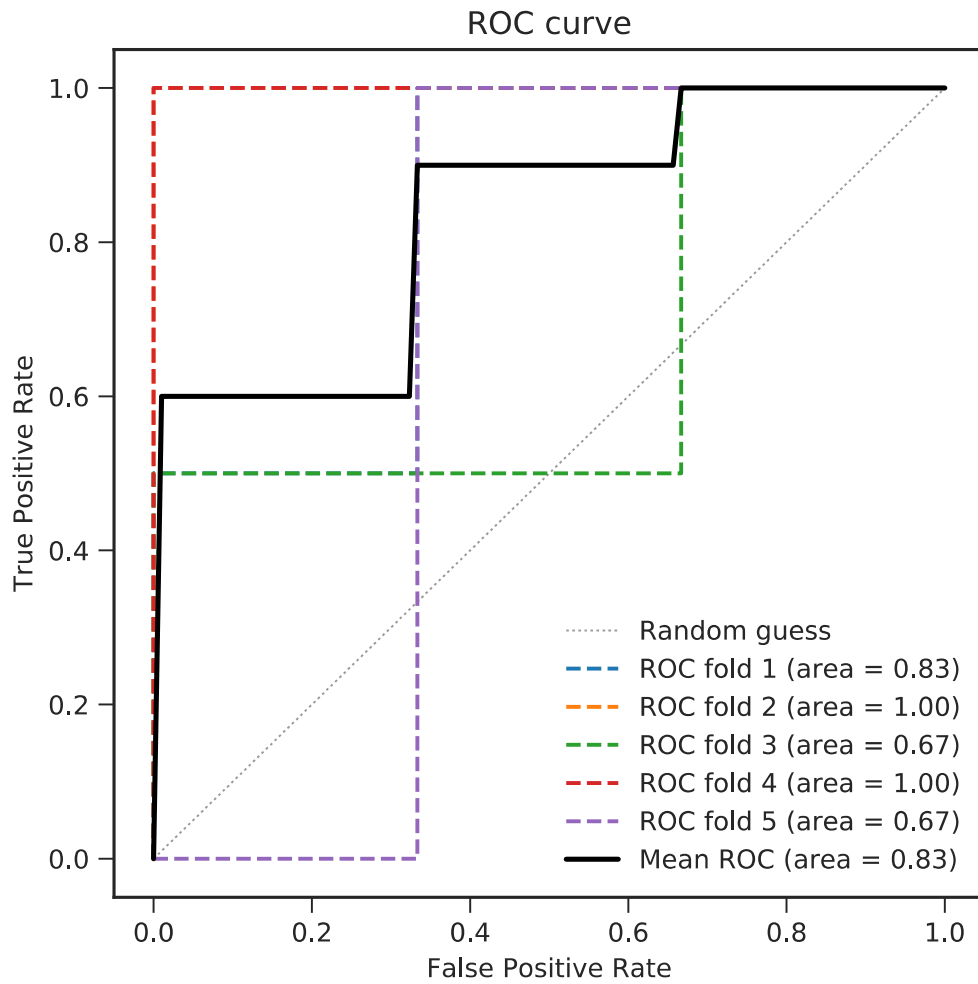

**Figure S5:** Performance of the model for differentiating PWS from CON using the identified fungal genera markers.

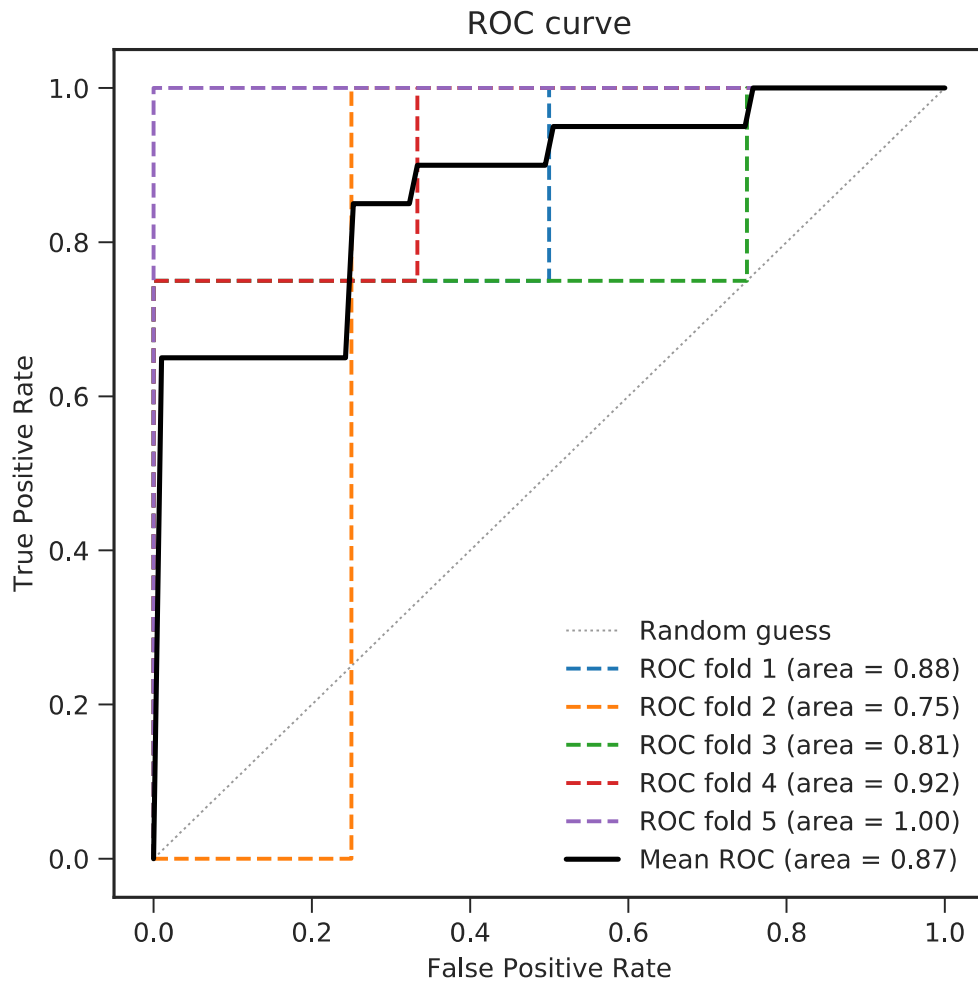

**Figure S6:** Performance of the model for differentiating OWOB CON from NW CON using the identified fungal species markers.

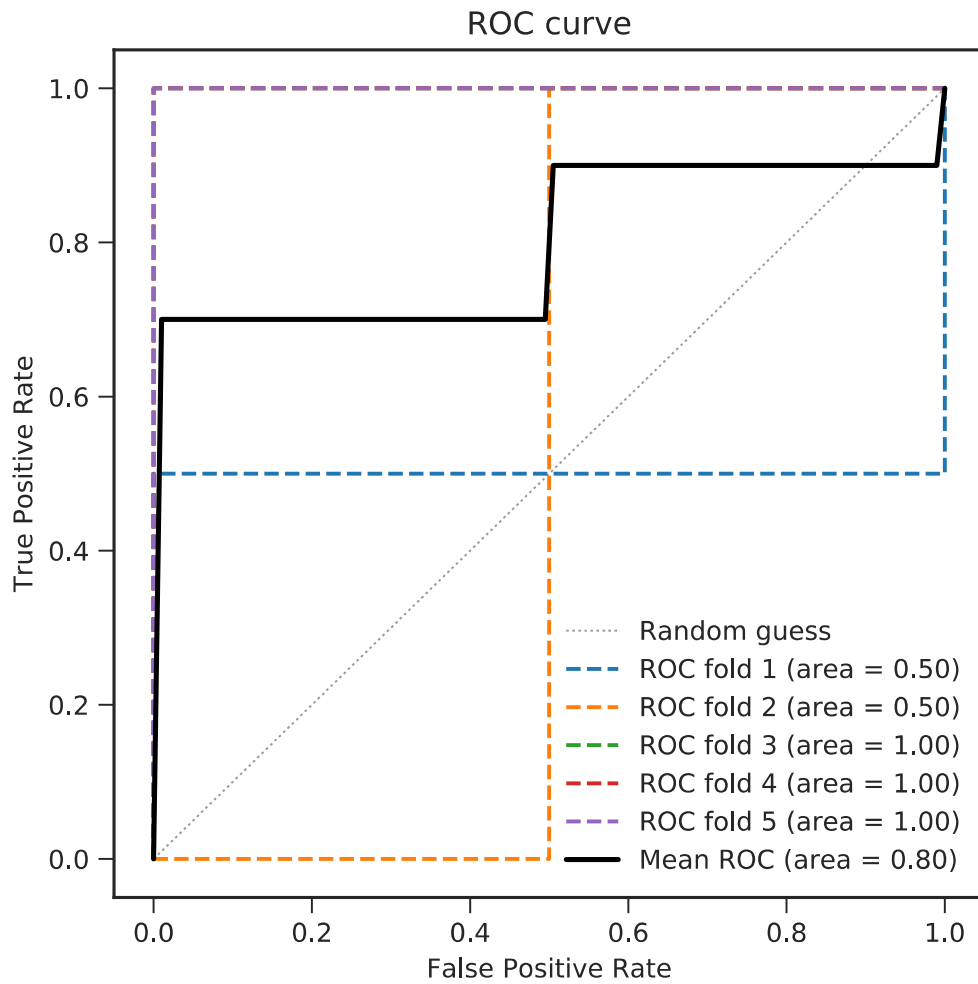

**Figure S7:** Performance of the model for differentiating OWOB PWS from NW PWS using the identified fungal genera.

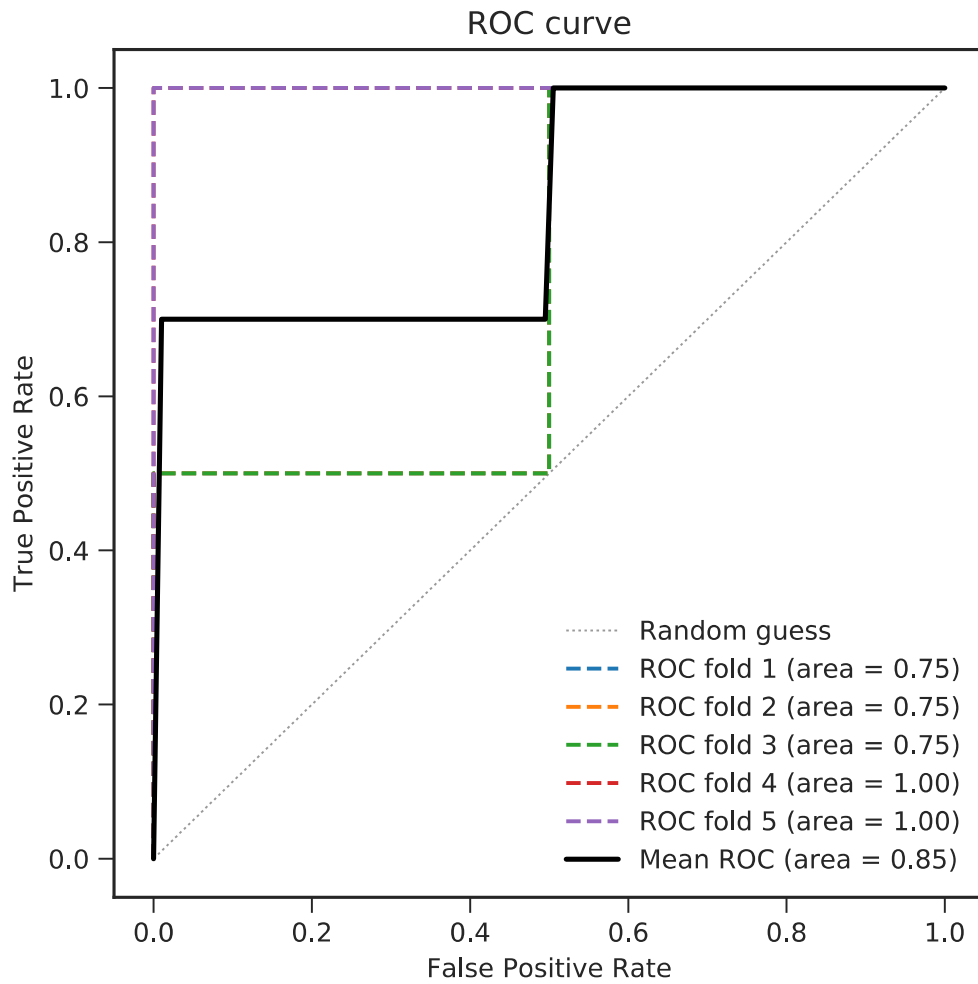

**Figure S8:** Performance of the model for differentiating PWS from CON using the identified bacterial and fungal genera.

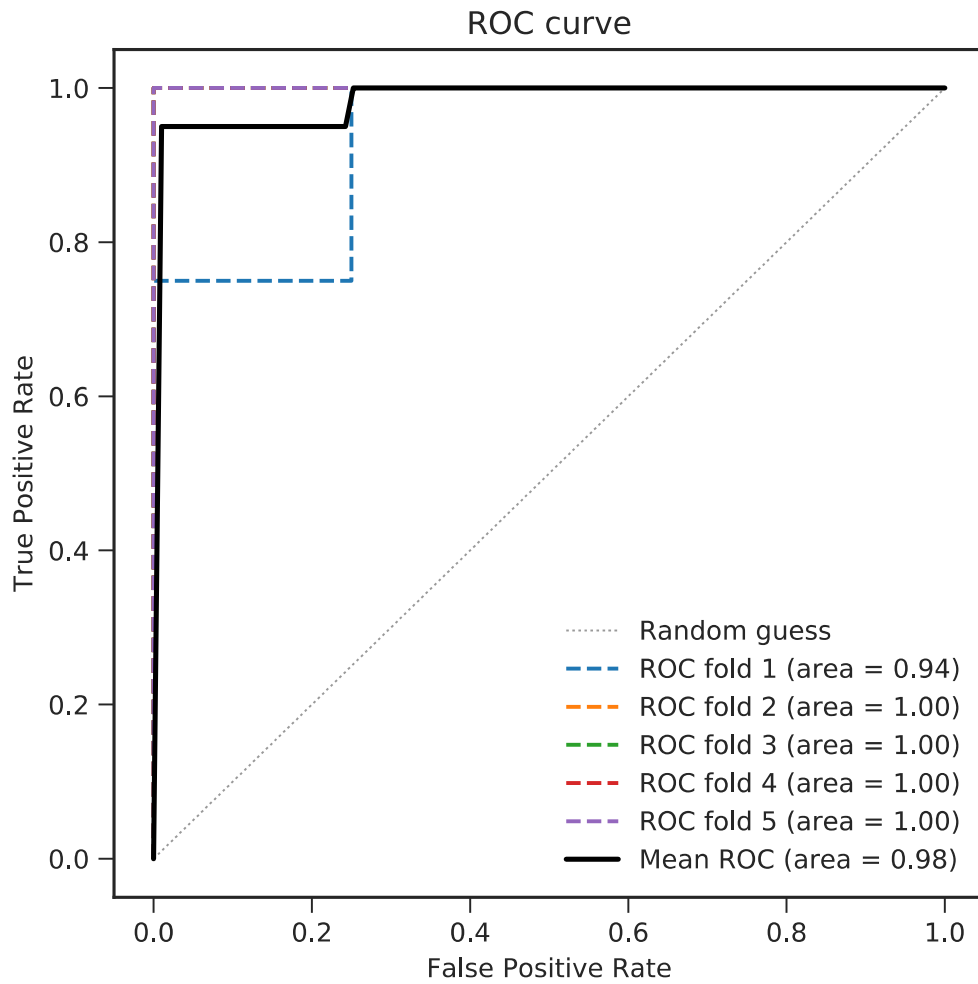



**Figure S9:** Performance of the model for differentiating OWOB CON from NW CON using the identified bacterial and fungal genera.

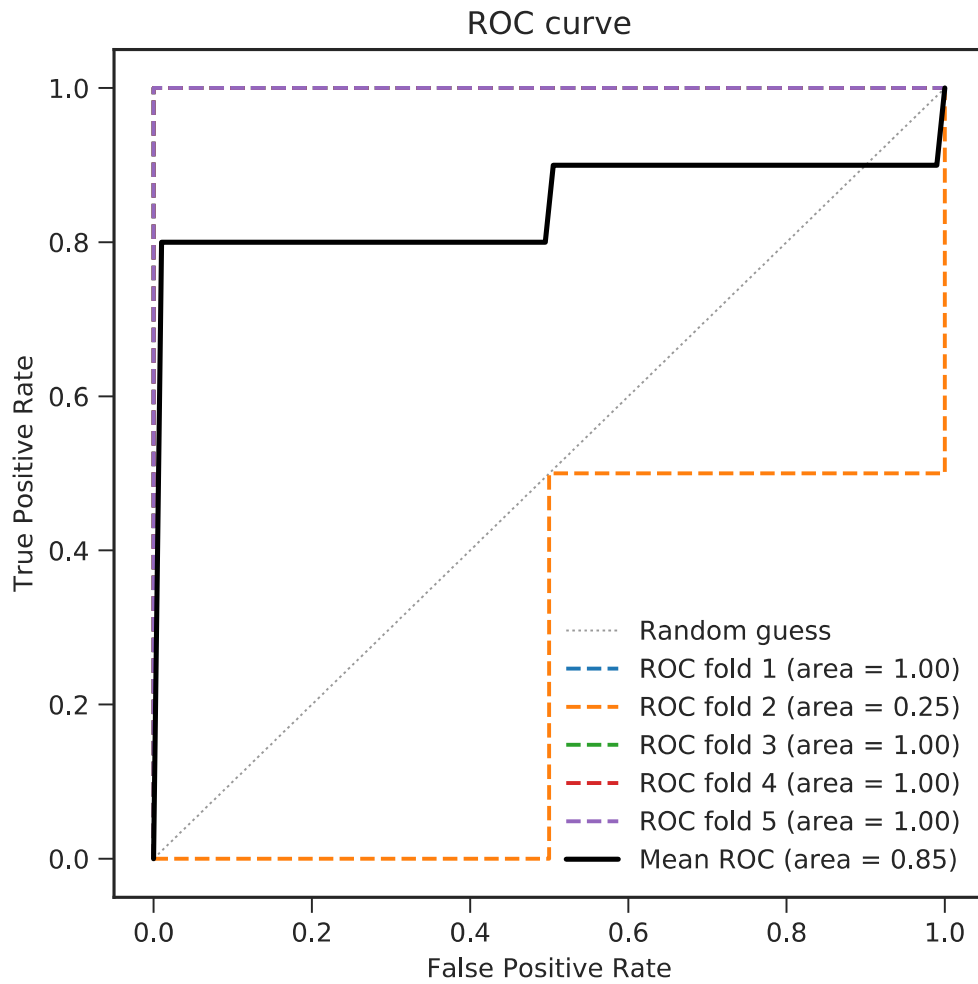

nera.

**Figure S10:** Performance of the model for differentiating OWOB PWS from NW PWS using the identified bacterial and fungal genera.

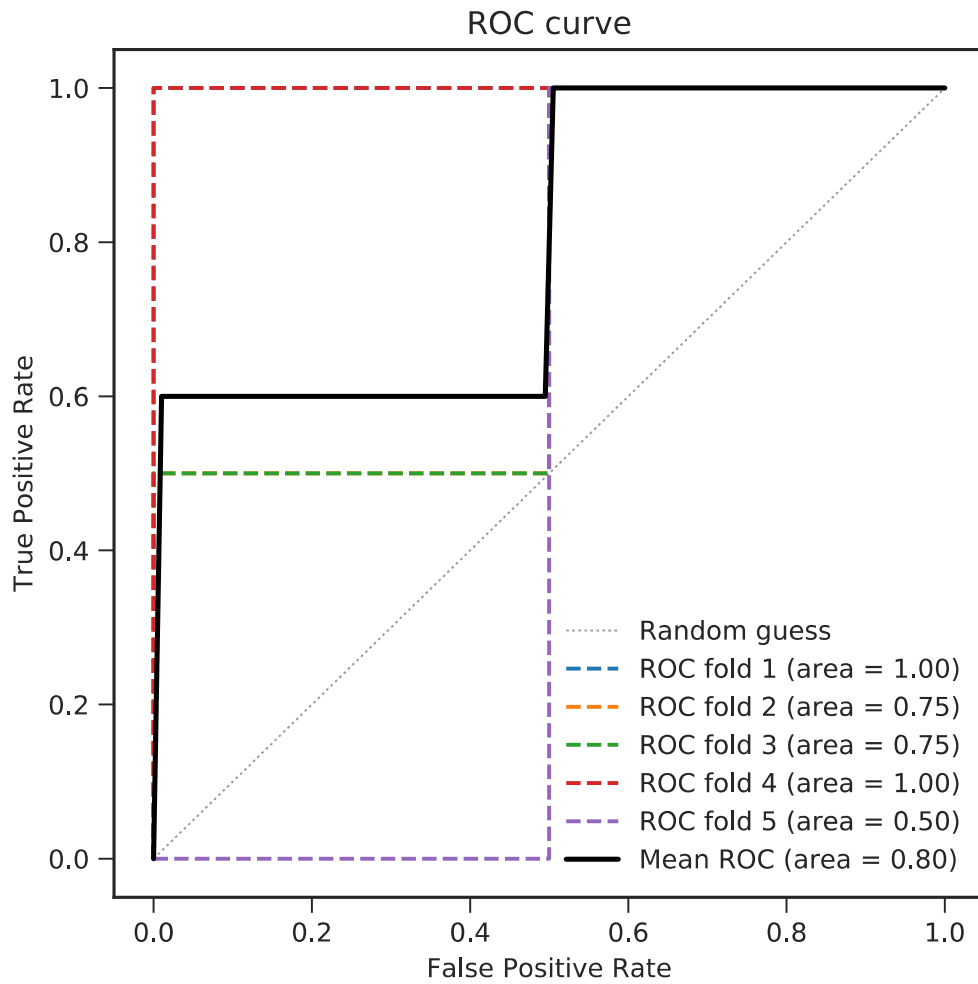

**Figure S11:** Correlation between dietary intakes and microbiota in the whole dataset. (A) Correlation of dietary intakes with bacterial genus-level abundance. (B) Correlation of dietary intakes with bacterial species-level diversity. (C) Correlation of dietary intakes with fungal genus-level abundance. (D) Correlation of dietary intakes with fungal species-level diversity. *Q* values were generated using the Bonferroni method. + indicates *q*-values between 0.05 and 0.1; \* indicates *q*-values less than 0.05.

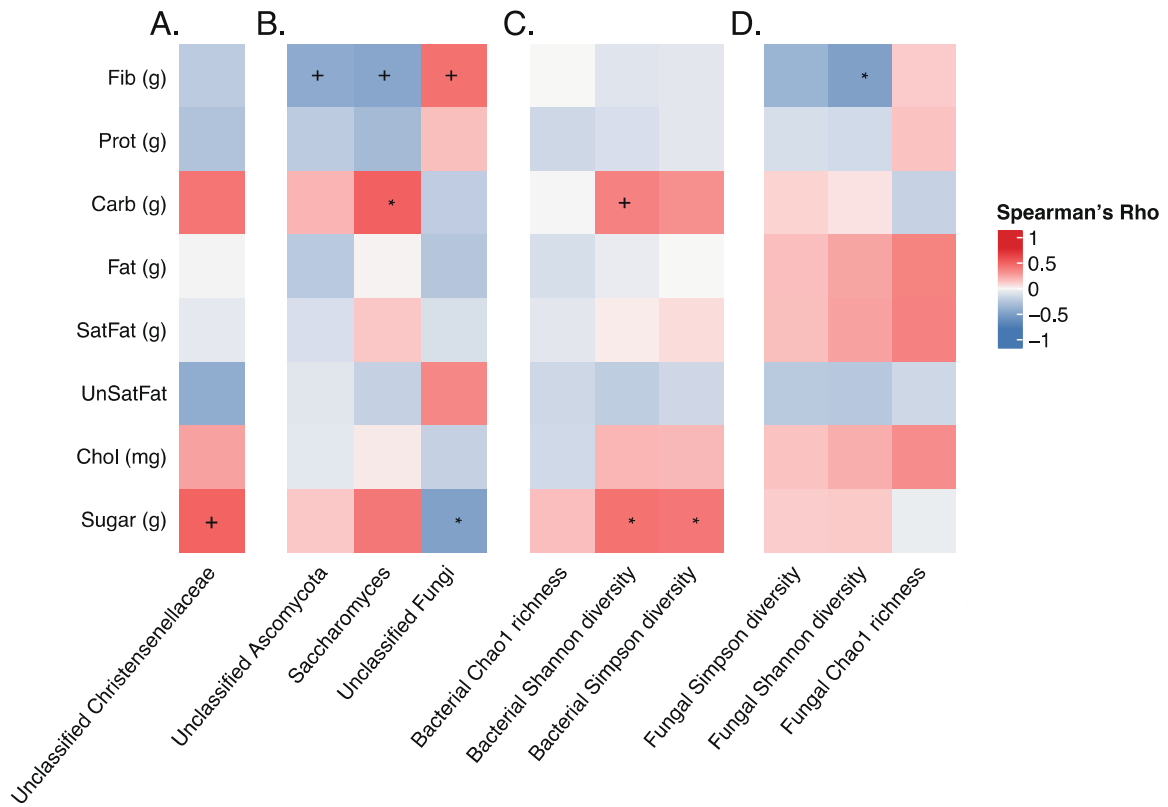

**Table S1:** Median values of  $\alpha$ -diversity indices.

|                       | Index   | NW CON             | OWOB CON           | NW PWS             | OWOB PWS           | CON               | PWS               |
|-----------------------|---------|--------------------|--------------------|--------------------|--------------------|-------------------|-------------------|
| All bacterial species | Chao1   | 93.5               | 86.59              | 99.1               | 101.61             | 92.6              | 100.72            |
|                       | Shannon | 2.44               | 2.55               | 2.17               | 2.16               | 2.49              | 2.17              |
|                       | Simpson | 0.83               | 0.83               | 0.82               | 0.79               | 0.83              | 0.82              |
| Actinobacteria        | Chao1   | 4.00 <sup>a</sup>  | 3.50 <sup>a</sup>  | 7.67 <sup>b</sup>  | 6.25 <sup>ab</sup> | 4.00 <sup>a</sup> | 7.00 <sup>b</sup> |
|                       | Shannon | 0.3                | 0.47               | 0.77               | 0.32               | 0.4               | 0.52              |
|                       | Simpson | 0.14               | 0.26               | 0.45               | 0.14               | 0.19              | 0.28              |
| Bacteroidetes         | Chao1   | 18                 | 13                 | 16                 | 19.25              | 17                | 16.17             |
|                       | Shannon | 1.28               | 1.16               | 0.92               | 0.75               | 1.22              | 0.9               |
|                       | Simpson | 0.6                | 0.56               | 0.42               | 0.35               | 0.58              | 0.42              |
| Firmicutes            | Chao1   | 59.5               | 55.71              | 62.5               | 60.45              | 58.17             | 61.9              |
|                       | Shannon | 2.09               | 2.25               | 2.2                | 2.15               | 2.14              | 2.2               |
|                       | Simpson | 0.8                | 0.81               | 0.82               | 0.79               | 0.8               | 0.81              |
| Lentisphaerae         | Chao1   | 0                  | 0                  | 0                  | 0                  | 0                 | 0                 |
|                       | Shannon | 0                  | 0                  | 0                  | 0                  | 0                 | 0                 |
|                       | Simpson | 1                  | 1                  | 1                  | 1                  | 1                 | 1                 |
| Proteobacteria        | Chao1   | 7                  | 7.75               | 7                  | 7.75               | 7                 | 7                 |
|                       | Shannon | 0.93 <sup>a</sup>  | 0.89 <sup>ab</sup> | 0.78 <sup>ab</sup> | 0.45 <sup>b</sup>  | 0.93 <sup>a</sup> | 0.59 <sup>b</sup> |
|                       | Simpson | 0.53 <sup>a</sup>  | 0.51 <sup>a</sup>  | 0.42 <sup>ab</sup> | 0.18 <sup>b</sup>  | 0.53 <sup>a</sup> | 0.30 <sup>b</sup> |
| Tenericutes           | Chao1   | 1                  | 0                  | 1                  | 1                  | 1                 | 1                 |
|                       | Shannon | 0                  | 0                  | 0                  | 0                  | 0                 | 0                 |
|                       | Simpson | 0.03 <sup>a</sup>  | 1.00 <sup>b</sup>  | 0.19 <sup>ab</sup> | 0.00 <sup>a</sup>  | 0.49              | 0                 |
| Verrucomicrobia       | Chao1   | 1.00 <sup>ab</sup> | 1.00 <sup>a</sup>  | 1.00 <sup>ab</sup> | 1.00 <sup>b</sup>  | 1                 | 1                 |
|                       | Shannon | 0                  | 0                  | 0                  | 0                  | 0                 | 0                 |
|                       | Simpson | 0                  | 0                  | 0                  | 0                  | 0                 | 0                 |
| All fungal species    | Chao1   | 8                  | 7                  | 8.25               | 9                  | 7                 | 9                 |
|                       | Shannon | 0.84               | 0.54               | 0.73               | 0.34               | 0.68              | 0.47              |
|                       | Simpson | 0.39               | 0.29               | 0.38               | 0.17               | 0.38              | 0.21              |
| Ascomycota            | Chao1   | 5                  | 5                  | 5                  | 5                  | 5                 | 5                 |
|                       | Shannon | 0.71               | 0.15               | 0.67               | 0.79               | 0.48              | 0.76              |
|                       | Simpson | 0.45               | 0.05               | 0.42               | 0.48               | 0.24              | 0.48              |
| Basidiomycota         | Chao1   | 1.00 <sup>ab</sup> | 1.00 <sup>a</sup>  | 1.00 <sup>ab</sup> | 3.00 <sup>b</sup>  | 1                 | 2                 |
|                       | Shannon | 0.00 <sup>ab</sup> | 0.00 <sup>a</sup>  | 0.00 <sup>ab</sup> | 0.30 <sup>b</sup>  | 0                 | 0.03              |
|                       | Simpson | 0                  | 0.33               | 0.07               | 0.39               | 0                 | 0.17              |

Comparison between the CON and PWS group: Wilcoxon test (two-sided); comparisons between subgroups: Dunn test (Bonferroni-adjusted p values). a, b, c, d In the same row, values for the four subgroups and for the two groups with different letter superscripts mean significant difference ( $p < 0.05$ )

**Table S2:** Median abundance and occurrence frequency of differentially abundant bacterial and fungal taxa.

| Model                                                         | Predictor                        | Median abundance       |                        |                        |                        |                       |                       | Occurrence frequency |                    |                    |                    |                   |                   |
|---------------------------------------------------------------|----------------------------------|------------------------|------------------------|------------------------|------------------------|-----------------------|-----------------------|----------------------|--------------------|--------------------|--------------------|-------------------|-------------------|
|                                                               |                                  | NW CON                 | OWOB CON               | NW PWS                 | OWOB PWS               | CON                   | PWS                   | NW CON               | OWOB CON           | NW PWS             | OWOB PWS           | CON               | PWS               |
| Differentially abundant bacterial genera: PWS vs. CON         | Akkermansia                      | 7.88E-03               | 1.11E-02               | 3.11E-04               | 5.31E-04               | 7.88E-03              | 3.11E-04              | 0.94                 | 0.63               | 0.87               | 1.00               | 0.85              | 0.92              |
|                                                               | Anaerostipes                     | 2.05E-04               | 3.35E-04               | 4.83E-05               | 2.66E-04               | 2.52E-04              | 7.62E-05              | 1.00 <sup>a</sup>    | 0.75 <sup>ab</sup> | 0.60 <sup>b</sup>  | 1.00 <sup>ab</sup> | 0.92              | 0.76              |
|                                                               | Clostridium (Ruminococcaceae)    | 0.00E+00 <sup>a</sup>  | 1.60E-04 <sup>ab</sup> | 1.04E-04 <sup>ab</sup> | 2.44E-04 <sup>b</sup>  | 5.10E-05              | 1.51E-04              | 0.47                 | 0.75               | 0.67               | 1.00               | 0.58              | 0.80              |
|                                                               | Dorea                            | 1.01E-03               | 1.56E-03               | 5.18E-04               | 8.50E-04               | 1.01E-03              | 6.07E-04              | 1.00                 | 1.00               | 1.00               | 1.00               | 1.00              | 1.00              |
|                                                               | Haemophilus                      | 1.08E-03               | 4.71E-04               | 2.89E-04               | 3.22E-04               | 8.46E-04              | 3.08E-04              | 0.88                 | 0.88               | 0.93               | 1.00               | 0.88              | 0.96              |
|                                                               | Oscillospira                     | 2.95E-02               | 2.11E-02               | 9.05E-03               | 1.22E-02               | 2.33E-02 <sup>a</sup> | 1.12E-02 <sup>a</sup> | 1.00                 | 1.00               | 1.00               | 1.00               | 1.00              | 1.00              |
|                                                               | Prevotella                       | 2.22E-04 <sup>ab</sup> | 1.65E-04 <sup>a</sup>  | 4.86E-04 <sup>b</sup>  | 2.78E-04 <sup>ab</sup> | 2.11E-04 <sup>a</sup> | 4.14E-04 <sup>b</sup> | 0.94                 | 0.75               | 1.00               | 1.00               | 0.88              | 1.00              |
|                                                               | Propionibacterium                | 0.00E+00 <sup>a</sup>  | 0.00E+00 <sup>ab</sup> | 1.74E-05 <sup>c</sup>  | 2.46E-05 <sup>bc</sup> | 0.00E+00 <sup>a</sup> | 1.74E-05 <sup>b</sup> | 0.00 <sup>a</sup>    | 0.00 <sup>ab</sup> | 0.73 <sup>c</sup>  | 0.60 <sup>bc</sup> | 0.00 <sup>a</sup> | 0.68 <sup>b</sup> |
|                                                               | SMB53                            | 4.46E-04 <sup>ab</sup> | 3.88E-03 <sup>a</sup>  | 6.26E-04 <sup>b</sup>  | 3.00E-04 <sup>ab</sup> | 9.02E-04              | 5.29E-04              | 1.00                 | 1.00               | 0.87               | 1.00               | 1.00              | 0.92              |
|                                                               | Staphylococcus                   | 0.00E+00 <sup>a</sup>  | 0.00E+00 <sup>ac</sup> | 4.14E-05 <sup>b</sup>  | 5.31E-05 <sup>bd</sup> | 0.00E+00 <sup>a</sup> | 4.85E-05 <sup>b</sup> | 0.06 <sup>a</sup>    | 0.00 <sup>ac</sup> | 0.73 <sup>b</sup>  | 0.80 <sup>bd</sup> | 0.04 <sup>a</sup> | 0.76 <sup>b</sup> |
|                                                               | Unclassified Christensenellaceae | 2.16E-04               | 3.07E-04               | 7.74E-05               | 1.44E-04               | 2.16E-04              | 8.63E-05              | 1.00                 | 0.88               | 0.80               | 0.80               | 0.96              | 0.80              |
|                                                               | Unclassified Enterobacteriaceae  | 0.00E+00 <sup>a</sup>  | 1.08E-04 <sup>ab</sup> | 5.65E-04 <sup>b</sup>  | 3.06E-04 <sup>a</sup>  | 2.87E-05 <sup>a</sup> | 3.93E-04 <sup>a</sup> | 0.47 <sup>a</sup>    | 0.88 <sup>ab</sup> | 1.00 <sup>b</sup>  | 1.00 <sup>ab</sup> | 0.62 <sup>a</sup> | 1.00 <sup>b</sup> |
|                                                               | Unclassified RF39                | 1.66E-04               | 0.00E+00               | 1.55E-04               | 1.96E-05               | 0.00E+00              | 8.93E-05              | 0.59                 | 0.13               | 0.67               | 0.70               | 0.46              | 0.68              |
|                                                               | Alistipes                        | 2.66E-02               | 1.02E-02               | 1.46E-02               | 1.75E-02               | 2.07E-02              | 1.55E-02              | 1.00                 | 1.00               | 0.93               | 1.00               | 1.00              | 0.96              |
|                                                               | Bacteria_unclassified genera     | 4.57E-03               | 5.00E-04               | 1.40E-03               | 1.70E-03               | 1.40E-03              | 1.40E-03              | 0.94                 | 0.88               | 1.00               | 0.90               | 0.92              | 0.96              |
|                                                               | Bifidobacterium                  | 4.08E-03 <sup>ab</sup> | 2.31E-02 <sup>a</sup>  | 1.74E-03 <sup>b</sup>  | 9.40E-03 <sup>ab</sup> | 6.02E-03              | 4.94E-03              | 1.00                 | 1.00               | 1.00               | 1.00               | 1.00              | 1.00              |
|                                                               | Biophilina                       | 1.24E-03               | 9.16E-05               | 7.92E-04               | 4.65E-04               | 8.58E-04              | 5.53E-04              | 0.94                 | 0.50               | 0.60               | 0.70               | 0.81              | 0.64              |
| Blautia                                                       | 8.47E-03                         | 1.73E-02               | 1.13E-02               | 8.18E-03               | 1.07E-02               | 8.33E-03              | 1.00                  | 1.00                 | 1.00               | 1.00               | 1.00               | 1.00              |                   |
| Collinsella                                                   | 1.10E-04                         | 8.97E-04               | 2.90E-04               | 1.64E-04               | 1.17E-04               | 2.18E-04              | 0.76                  | 0.63                 | 0.80               | 0.90               | 0.73               | 0.84              |                   |
| Dialister                                                     | 0.00E+00 <sup>a</sup>            | 3.38E-03 <sup>b</sup>  | 1.71E-05 <sup>a</sup>  | 9.55E-04 <sup>ab</sup> | 1.12E-04               | 1.45E-04              | 0.47                  | 1.00                 | 0.53               | 0.90               | 0.62               | 0.68              |                   |
| Dorea                                                         | 1.01E-03                         | 1.56E-03               | 5.18E-04               | 8.50E-04               | 1.01E-03               | 6.07E-04              | 1.00                  | 1.00                 | 1.00               | 1.00               | 1.00               | 1.00              |                   |
| Holdemania                                                    | 8.61E-05                         | 1.31E-04               | 8.07E-05               | 1.23E-04               | 9.02E-05               | 9.71E-05              | 0.94                  | 0.75                 | 0.87               | 1.00               | 0.88               | 0.92              |                   |
| SMB53                                                         | 4.46E-04 <sup>ab</sup>           | 3.88E-03 <sup>a</sup>  | 6.26E-04 <sup>b</sup>  | 3.00E-04 <sup>ab</sup> | 9.02E-04               | 5.29E-04              | 1.00                  | 1.00                 | 0.87               | 1.00               | 1.00               | 0.92              |                   |
| Sutterella                                                    | 1.78E-02 <sup>ab</sup>           | 1.06E-02 <sup>ab</sup> | 3.91E-03 <sup>a</sup>  | 2.48E-02 <sup>b</sup>  | 1.65E-02               | 1.11E-02              | 1.00                  | 1.00                 | 0.93               | 1.00               | 1.00               | 0.96              |                   |
| Turicibacter                                                  | 8.61E-05 <sup>ab</sup>           | 3.21E-04 <sup>a</sup>  | 9.14E-05 <sup>ab</sup> | 1.42E-05 <sup>b</sup>  | 9.02E-05               | 6.90E-05              | 0.82                  | 1.00                 | 0.80               | 0.60               | 0.88               | 0.72              |                   |
| Differentially abundant bacterial genera: OWOB PWS vs. NW PWS | Anaerostipes                     | 2.05E-04               | 3.35E-04               | 4.83E-05               | 2.66E-04               | 2.52E-04              | 7.62E-05              | 1.00 <sup>a</sup>    | 0.75 <sup>ab</sup> | 0.60 <sup>b</sup>  | 1.00 <sup>ab</sup> | 0.92              | 0.76              |
|                                                               | Bacteroides                      | 3.39E-01               | 3.57E-01               | 2.69E-01               | 3.60E-01               | 3.39E-01              | 3.08E-01              | 1.00                 | 1.00               | 1.00               | 1.00               | 1.00              | 1.00              |
|                                                               | Bifidobacterium                  | 4.08E-03 <sup>ab</sup> | 2.31E-02 <sup>a</sup>  | 1.74E-03 <sup>b</sup>  | 9.40E-03 <sup>ab</sup> | 6.02E-03              | 4.94E-03              | 1.00                 | 1.00               | 1.00               | 1.00               | 1.00              | 1.00              |
|                                                               | Clostridium (Clostridiaceae)     | 1.21E-03               | 1.31E-03               | 7.07E-04               | 5.28E-04               | 1.21E-03              | 7.07E-04              | 1.00                 | 1.00               | 1.00               | 1.00               | 1.00              | 1.00              |
|                                                               | Clostridium (Lachnospiraceae)    | 4.83E-03               | 6.38E-03               | 4.49E-03               | 3.21E-03               | 4.98E-03              | 4.14E-03              | 1.00                 | 1.00               | 1.00               | 1.00               | 1.00              | 1.00              |
|                                                               | Clostridium (Ruminococcaceae)    | 0.00E+00 <sup>a</sup>  | 1.60E-04 <sup>ab</sup> | 1.04E-04 <sup>ab</sup> | 2.44E-04 <sup>b</sup>  | 5.10E-05              | 1.51E-04              | 0.47                 | 0.75               | 0.67               | 1.00               | 0.58              | 0.80              |
|                                                               | Coprococcus                      | 5.93E-03               | 1.00E-02               | 4.87E-03               | 9.31E-03               | 9.14E-03              | 6.96E-03              | 1.00                 | 1.00               | 1.00               | 1.00               | 1.00              | 1.00              |
|                                                               | Dialister                        | 0.00E+00 <sup>a</sup>  | 3.38E-03 <sup>b</sup>  | 1.71E-05 <sup>a</sup>  | 9.55E-04 <sup>ab</sup> | 1.12E-04              | 1.45E-04              | 0.47                 | 1.00               | 0.53               | 0.90               | 0.62              | 0.68              |
|                                                               | Escherichia                      | 8.05E-05               | 2.26E-04               | 3.52E-04               | 5.75E-05               | 1.96E-04              | 1.47E-04              | 0.76                 | 0.75               | 1.00               | 0.90               | 0.77              | 0.96              |
|                                                               | Parabacteroides                  | 7.93E-03               | 8.65E-03               | 5.63E-03               | 5.60E-03               | 7.93E-03              | 5.96E-03              | 0.88                 | 1.00               | 0.87               | 0.80               | 0.92              | 0.84              |
|                                                               | Prevotella                       | 2.22E-04 <sup>ab</sup> | 1.65E-04 <sup>a</sup>  | 4.86E-04 <sup>b</sup>  | 2.78E-04 <sup>ab</sup> | 2.11E-04 <sup>a</sup> | 4.14E-04 <sup>b</sup> | 0.94                 | 0.75               | 1.00               | 1.00               | 0.88              | 1.00              |
|                                                               | Sutterella                       | 1.78E-02 <sup>ab</sup> | 1.06E-02 <sup>ab</sup> | 3.91E-03 <sup>a</sup>  | 2.48E-02 <sup>b</sup>  | 1.65E-02              | 1.11E-02              | 1.00                 | 1.00               | 0.93               | 1.00               | 1.00              | 0.96              |
|                                                               | Turicibacter                     | 8.61E-05 <sup>ab</sup> | 3.21E-04 <sup>a</sup>  | 9.14E-05 <sup>ab</sup> | 1.42E-05 <sup>b</sup>  | 9.02E-05              | 6.90E-05              | 0.82                 | 1.00               | 0.80               | 0.60               | 0.88              | 0.72              |
|                                                               | Candida                          | 7.43E-03               | 0.00E+00               | 8.70E-02               | 6.05E-02               | 2.08E-03 <sup>a</sup> | 6.71E-02 <sup>b</sup> | 0.73                 | 0.43               | 0.90               | 0.89               | 0.61              | 0.89              |
|                                                               | Mrakia                           | 0.00E+00               | 0.00E+00               | 0.00E+00               | 0.00E+00               | 0.00E+00 <sup>a</sup> | 0.00E+00 <sup>b</sup> | 0.00                 | 0.00               | 0.40               | 0.22               | 0.00 <sup>a</sup> | 0.32 <sup>b</sup> |
|                                                               | Saccharomyces                    | 9.07E-02 <sup>ab</sup> | 8.32E-01 <sup>a</sup>  | 1.40E-04 <sup>b</sup>  | 8.70E-04 <sup>b</sup>  | 2.23E-01 <sup>a</sup> | 2.81E-04 <sup>b</sup> | 1.00                 | 1.00               | 0.50               | 0.67               | 1.00 <sup>a</sup> | 0.58 <sup>b</sup> |
|                                                               | Unclassified Agaricomycetes      | 0.00E+00               | 0.00E+00               | 0.00E+00               | 0.00E+00               | 0.00E+00 <sup>a</sup> | 0.00E+00 <sup>b</sup> | 0.00                 | 0.00               | 0.20               | 0.44               | 0.00 <sup>a</sup> | 0.32 <sup>b</sup> |
| Unclassified Ascomycota                                       | 5.11E-03                         | 2.17E-03               | 6.45E-03               | 2.72E-04               | 5.64E-03               | 7.32E-04              | 1.00                  | 0.86                 | 0.90               | 0.89               | 0.94               | 0.89              |                   |
| Unclassified Basidiomycota                                    | 0.00E+00 <sup>a</sup>            | 0.00E+00 <sup>a</sup>  | 2.34E-05 <sup>ab</sup> | 7.73E-04 <sup>b</sup>  | 0.00E+00 <sup>a</sup>  | 2.64E-04 <sup>b</sup> | 0.09 <sup>a</sup>     | 0.14 <sup>ab</sup>   | 0.50 <sup>ab</sup> | 0.78 <sup>b</sup>  | 0.11 <sup>a</sup>  | 0.63 <sup>b</sup> |                   |
| Differentially abundant bacterial genera: OWOB CON vs. NW CON | Candida                          | 7.43E-03               | 0.00E+00               | 8.70E-02               | 6.05E-02               | 2.08E-03 <sup>a</sup> | 6.71E-02 <sup>b</sup> | 0.73                 | 0.43               | 0.90               | 0.89               | 0.61              | 0.89              |
|                                                               | Cyberlindnera                    | 0.00E+00               | 0.00E+00               | 0.00E+00               | 0.00E+00               | 0.00E+00              | 0.00E+00              | 0.27                 | 0.43               | 0.40               | 0.33               | 0.33              | 0.37              |
|                                                               | Fungi_unclassified genera        | 5.98E-01               | 9.44E-02               | 2.90E-01               | 7.89E-01               | 2.50E-01              | 7.47E-01              | 1.00                 | 1.00               | 1.00               | 1.00               | 1.00              | 1.00              |
|                                                               | Saccharomyces                    | 9.07E-02 <sup>ab</sup> | 8.32E-01 <sup>a</sup>  | 1.40E-04 <sup>b</sup>  | 8.70E-04 <sup>b</sup>  | 2.23E-01 <sup>a</sup> | 2.81E-04 <sup>b</sup> | 1.00                 | 1.00               | 0.50               | 0.67               | 1.00 <sup>a</sup> | 0.58 <sup>b</sup> |
|                                                               | Unclassified Ascomycota          | 5.11E-03               | 2.17E-03               | 6.45E-03               | 2.72E-04               | 5.64E-03              | 7.32E-04              | 1.00                 | 0.86               | 0.90               | 0.89               | 0.94              | 0.89              |
| Differentially abundant fungal genera: OWOB PWS vs. NW PWS    | Fungi_unclassified genera        | 5.98E-01               | 9.44E-02               | 2.90E-01               | 7.89E-01               | 2.50E-01              | 7.47E-01              | 1.00                 | 1.00               | 1.00               | 1.00               | 1.00              | 1.00              |
|                                                               | Saccharomyces                    | 9.07E-02 <sup>ab</sup> | 8.32E-01 <sup>a</sup>  | 1.40E-04 <sup>b</sup>  | 8.70E-04 <sup>b</sup>  | 2.23E-01 <sup>a</sup> | 2.81E-04 <sup>b</sup> | 1.00                 | 1.00               | 0.50               | 0.67               | 1.00 <sup>a</sup> | 0.58 <sup>b</sup> |
|                                                               | Unclassified Ascomycota          | 5.11E-03               | 2.17E-03               | 6.45E-03               | 2.72E-04               | 5.64E-03              | 7.32E-04              | 1.00                 | 0.86               | 0.90               | 0.89               | 0.94              | 0.89              |
|                                                               | Unclassified Basidiomycota       | 0.00E+00 <sup>a</sup>  | 0.00E+00 <sup>a</sup>  | 2.34E-05 <sup>ab</sup> | 7.73E-04 <sup>b</sup>  | 0.00E+00 <sup>a</sup> | 2.64E-04 <sup>b</sup> | 0.09 <sup>a</sup>    | 0.14 <sup>ab</sup> | 0.50 <sup>ab</sup> | 0.78 <sup>b</sup>  | 0.11 <sup>a</sup> | 0.63 <sup>b</sup> |

Comparison of abundance between the CON and PWS group: Wilcoxon test (two-sided); comparisons of abundance between the subgroups: Dunn test (adjusted p values). Comparison of occurrence frequency between CON and PWS: Fisher's Exact test; comparisons of occurrence between the subgroups: Fisher's Exact test with Bonferroni correction. a, b, c, d in the same row, values for the four subgroups and for the two groups with different letter superscripts mean significant difference (p<0.05).

**Table S3:** Median values of nutrition intakes.

|            | NW CON             | OWOB CON            | NW PWS             | OWOB PWS            | CON                | PWS                |
|------------|--------------------|---------------------|--------------------|---------------------|--------------------|--------------------|
| Fib (g)    | 20.2               | 14.2                | 18.1               | 19.7                | 16.5               | 19.0               |
| Prot (g)   | 60.7               | 68.2                | 69.6               | 71.9                | 64.4               | 70.6               |
| Carb (g)   | 227.9 <sup>a</sup> | 222.8 <sup>ab</sup> | 175.4 <sup>b</sup> | 195.1 <sup>ab</sup> | 225.3 <sup>a</sup> | 189.2 <sup>b</sup> |
| Fat (g)    | 202.2              | 204.5               | 201.3              | 206.2               | 202.2              | 203.6              |
| SatFat (g) | 201.6              | 196.2               | 194.8              | 197.8               | 197.8              | 195.1              |
| UnSatFat   | 373.2              | 373.4               | 376.5              | 374.0               | 373.2              | 376.3              |
| Chol (mg)  | 147.0              | 212.7               | 161.9              | 187.3               | 162.8              | 178.5              |
| Sugar (g)  | 199.9              | 207.5               | 197.6              | 200.0               | 203.5              | 197.9              |

Comparison between CON and PWS: Wilcoxon test (two-sided); comparisons between the subgroups: Dunn test (adjusted p values). a, b, c, d in the same row, values for the four subgroups and for the two groups with different letter superscripts mean significant difference (p<0.05).

**Table S4:** Logistic regression for the association between CHO intake, group and dichotomized abundance of differentially abundant bacterial and fungal taxa.

| Genus-level abundance (Ref: below-the-median) | Estimates in logistic regression model |              |                               |              |                              |       |
|-----------------------------------------------|----------------------------------------|--------------|-------------------------------|--------------|------------------------------|-------|
|                                               | CHO (Ref: above-the-median)            |              | Group (Ref: PWS)              |              | CHO * Group                  |       |
|                                               | Odds ratio (95% confidence interval)   | p value      | Odds ratio (95% conf p value) |              | Odds ratio (95% cor p value) |       |
| Staphylococcus                                | 1.08 (0.15, 7.64)                      | 0.936        | 0.02 (0.00, 0.27)             | <b>0.003</b> | 0 (0, NA)                    | 0.999 |
| Unclassified Enterobacteriaceae               | 0.34 (0.03, 3.56)                      | 0.37         | 0.03 (0.00, 0.35)             | <b>0.005</b> | 8.17 (0.40, 166.29)          | 0.172 |
| Propionibacterium                             | 1.44 (0.25, 8.46)                      | 0.687        | 0 (0, NA)                     | 0.998        | 0.69 (0, NA)                 | 1     |
| Prevotella                                    | 1.95 (0.32, 12.01)                     | 0.472        | 0.25 (0.04, 1.47)             | 0.125        | 0.41 (0.03, 5.73)            | 0.508 |
| Oscillospira                                  | 0.42 (0.07, 2.36)                      | 0.323        | 2.40 (0.42, 13.60)            | 0.323        | 1.00 (0.09, 11.63)           | 1     |
| Dorea                                         | 0.33 (0.06, 1.87)                      | 0.209        | 0.86 (0.15, 4.82)             | 0.861        | 2.14 (0.19, 24.23)           | 0.539 |
| Clostridium (Ruminococcaceae)                 | 0.48 (0.07, 3.09)                      | 0.437        | 0.30 (0.05, 1.91)             | 0.2          | 0.34 (0.02, 6.55)            | 0.473 |
| SMB53                                         | 7.88 (0.79, 78.67)                     | 0.079        | 10.00 (1.00, 100.46)          | 0.05         | 0.15 (0.01, 2.63)            | 0.193 |
| UnclassifiedRF39                              | 3.06 (0.54, 17.46)                     | 0.209        | 1.48 (0.27, 8.27)             | 0.654        | 0.22 (0.02, 2.56)            | 0.227 |
| Akkermansia                                   | 2.10 (0.32, 13.61)                     | 0.437        | 7.20 (1.07, 48.64)            | <b>0.043</b> | 0.20 (0.02, 2.54)            | 0.214 |
| Anaerostipes                                  | 0.25 (0.04, 1.47)                      | 0.125        | 1.10 (0.19, 6.29)             | 0.915        | 2.18 (0.19, 25.52)           | 0.534 |
| Unclassified Christensenellaceae              | 0.14 (0.02, 0.94)                      | <b>0.043</b> | 0.61 (0.09, 4.02)             | 0.608        | 2.36 (0.18, 31.29)           | 0.516 |
| Haemophilus                                   | 7.88 (0.79, 78.67)                     | 0.079        | 12.83 (1.26, 130.51)          | <b>0.031</b> | 0.07 (0.00, 1.22)            | 0.068 |
| Saccharomyces                                 | 0 (0, NA)                              | 0.999        | 6.00 (0.70, 51.10)            | 0.101        | INF (0, NA)                  | 0.999 |
| Candida                                       | 0 (0, NA)                              | 0.999        | 0 (0, NA)                     | 0.999        | INF (0, NA)                  | 0.999 |
| Mrakia                                        | 1.25 (0.16, 9.54)                      | 0.83         | 0 (0, NA)                     | 0.999        | 0.80 (0, NA)                 | 1     |
| Unclassified Basidiomycota                    | 0.56 (0.08, 4.14)                      | 0.57         | 0.09 (0.01, 0.84)             | <b>0.035</b> | 0 (0, NA)                    | 0.999 |
| Unclassified Ascomycota                       | 0.25 (0.03, 1.82)                      | 0.171        | 1.31 (0.19, 9.10)             | 0.783        | 3.05 (0.19, 48.86)           | 0.431 |
| Unclassified Agaricomycetes                   | 4.29 (0.39, 47.63)                     | 0.236        | 0 (0, NA)                     | 0.999        | 0.23 (0, NA)                 | 1     |

INF: infinite value; NA: not available.

**Table S5:** Logistic regression for the association between hyperphagia scores, group and dichotomized abundance of differentially abundant bacterial and fungal taxa.

| Genus-level abundance (Ref: below-the-median) | Estimates in logistic regression model    |                    |                               |                      |                               |                      |       |
|-----------------------------------------------|-------------------------------------------|--------------------|-------------------------------|----------------------|-------------------------------|----------------------|-------|
|                                               | Hyperphagia score (Ref: above-the-median) |                    |                               | Group (Ref: PWS)     |                               | Score * Group        |       |
|                                               | Odds ratio (95% confidence interval)      | p value            | Odds ratio (95% conf p value) |                      | Odds ratio (95% conf p value) |                      |       |
| Staphylococcus                                | Behaviour score                           | 0.15 (0.01, 1.50)  | 0.105                         | 0.02 (0.00, 0.29)    | <b>0.005</b>                  | 0 (0, NA)            | 0.999 |
| Staphylococcus                                | Drive score                               | 0.23 (0.03, 1.63)  | 0.141                         | 0 (0, NA)            | 0.999                         | INF (0, NA)          | 0.999 |
| Staphylococcus                                | Severity score                            | 0.27 (0.04, 1.86)  | 0.183                         | 0.05 (0.00, 0.62)    | <b>0.02</b>                   | 0 (0, NA)            | 0.998 |
| Staphylococcus                                | Total score                               | 0.23 (0.03, 1.63)  | 0.141                         | 0.02 (0.00, 0.22)    | 0.017                         | 0 (0, NA)            | 0.999 |
| Unclassified Enterobacteriaceae               | Behaviour score                           | 2.75 (0.40, 18.88) | 0.303                         | 0 (0, NA)            | 0.999                         | INF (0, NA)          | 0.999 |
| Unclassified Enterobacteriaceae               | Drive score                               | 4.50 (0.44, 46.17) | 0.205                         | 0.07 (0.01, 0.75)    | 0.071                         | 0.65 (0.02, 17.60)   | 0.648 |
| Unclassified Enterobacteriaceae               | Severity score                            | 2.31 (0.22, 24.32) | 0.486                         | 0.10 (0.01, 1.08)    | 0.058                         | 0.58 (0.02, 16.84)   | 0.75  |
| Unclassified Enterobacteriaceae               | Total score                               | 4.50 (0.44, 46.17) | 0.205                         | 0.06 (0.01, 0.57)    | 0.015                         | 1.00 (0.04, 26.91)   | 1     |
| Propionibacterium                             | Behaviour score                           | 0.53 (0.10, 2.98)  | 0.474                         | 0 (0, NA)            | 0.999                         | 1.88 (0.00, NA)      | 1     |
| Propionibacterium                             | Drive score                               | 1.17 (0.21, 6.56)  | 0.861                         | 0 (0, NA)            | 0.999                         | 0.86 (0.00, NA)      | 1     |
| Propionibacterium                             | Severity score                            | 3.82 (0.38, 38.83) | 0.258                         | 0 (0, NA)            | 0.999                         | 0.26 (0.00, NA)      | 1     |
| Propionibacterium                             | Total score                               | 1.17 (0.21, 6.56)  | 0.861                         | 0 (0, NA)            | 0.999                         | 0.86 (0.00, NA)      | 1     |
| Prevotella                                    | Behaviour score                           | 0.32 (0.05, 2.11)  | 0.236                         | 0 (0, NA)            | 0.999                         | INF (0, NA)          | 0.999 |
| Prevotella                                    | Drive score                               | 0.85 (0.14, 4.99)  | 0.856                         | 0 (0, NA)            | 0.999                         | INF (0, NA)          | 0.999 |
| Prevotella                                    | Severity score                            | 0.38 (0.06, 2.46)  | 0.31                          | 0 (0, NA)            | 0.999                         | INF (0, NA)          | 0.999 |
| Prevotella                                    | Total score                               | 0.38 (0.06, 2.24)  | 0.283                         | 0 (0, NA)            | 0.999                         | INF (0, NA)          | 0.999 |
| Oscillospira                                  | Behaviour score                           | 1.25 (0.24, 6.44)  | 0.79                          | 12.00 (1.05, 136.79) | 0.045                         | 0.17 (0.01, 2.84)    | 0.215 |
| Oscillospira                                  | Drive score                               | 0.64 (0.12, 3.53)  | 0.611                         | 0.90 (0.15, 5.26)    | 0.907                         | 8.43 (0.70, 101.65)  | 0.093 |
| Oscillospira                                  | Severity score                            | 0.63 (0.10, 4.18)  | 0.631                         | 2.36 (0.31, 17.85)   | 0.407                         | 1.97 (0.12, 31.21)   | 0.631 |
| Oscillospira                                  | Total score                               | 0.64 (0.12, 3.53)  | 0.611                         | 2.25 (0.44, 11.52)   | 0.33                          | 2.07 (0.19, 22.34)   | 0.547 |
| Dorea                                         | Behaviour score                           | 0.63 (0.13, 3.07)  | 0.562                         | 2.50 (0.34, 18.33)   | 0.367                         | 0.64 (0.05, 7.52)    | 0.723 |
| Dorea                                         | Drive score                               | 0.38 (0.07, 2.03)  | 0.256                         | 2.63 (0.40, 17.46)   | 0.318                         | 0.79 (0.06, 9.77)    | 0.79  |
| Dorea                                         | Severity score                            | 0.40 (0.06, 2.63)  | 0.34                          | 1.50 (0.20, 11.24)   | 0.693                         | 2.04 (0.13, 31.62)   | 0.611 |
| Dorea                                         | Total score                               | 0.38 (0.07, 2.03)  | 0.256                         | 1.31 (0.26, 6.64)    | 0.742                         | 2.03 (0.20, 21.15)   | 0.553 |
| Clostridium (Ruminococcaceae)                 | Behaviour score                           | 0.39 (0.07, 2.13)  | 0.277                         | 0.13 (0.02, 1.09)    | 0.06                          | 4.09 (0.32, 52.20)   | 0.278 |
| Clostridium (Ruminococcaceae)                 | Drive score                               | 0.36 (0.07, 1.97)  | 0.24                          | 0.36 (0.06, 2.19)    | 0.27                          | 1.15 (0.10, 12.88)   | 0.912 |
| Clostridium (Ruminococcaceae)                 | Severity score                            | 0.67 (0.11, 3.99)  | 0.657                         | 0.33 (0.04, 2.56)    | 0.291                         | 1.21 (0.08, 17.88)   | 0.889 |
| Clostridium (Ruminococcaceae)                 | Total score                               | 0.36 (0.07, 1.97)  | 0.24                          | 0.16 (0.03, 0.92)    | <b>0.04</b>                   | 4.28 (0.39, 46.98)   | 0.235 |
| SMB53                                         | Behaviour score                           | 3.50 (0.64, 19.20) | 0.149                         | 4.00 (0.55, 29.17)   | 0.171                         | 0.34 (0.03, 3.93)    | 0.385 |
| SMB53                                         | Drive score                               | 1.00 (0.20, 5.12)  | 1                             | 1.50 (0.27, 8.45)    | 0.646                         | 1.83 (0.17, 19.45)   | 0.615 |
| SMB53                                         | Severity score                            | 1.18 (0.20, 6.93)  | 0.856                         | 6.29 (0.58, 68.42)   | 0.131                         | 0.26 (0.01, 4.97)    | 0.259 |
| SMB53                                         | Total score                               | 2.00 (0.39, 10.31) | 0.407                         | 3.00 (0.57, 15.77)   | 0.194                         | 0.50 (0.05, 5.06)    | 0.557 |
| Unclassified RF39                             | Behaviour score                           | 1.60 (0.33, 7.85)  | 0.562                         | 0.40 (0.06, 2.93)    | 0.367                         | 1.56 (0.13, 18.36)   | 0.723 |
| Unclassified RF39                             | Drive score                               | 1.31 (0.26, 6.64)  | 0.742                         | 0.53 (0.09, 3.03)    | 0.525                         | 1.13 (0.11, 11.99)   | 0.92  |
| Unclassified RF39                             | Severity score                            | 0.48 (0.08, 2.81)  | 0.413                         | 0.16 (0.02, 1.73)    | 0.131                         | 8.38 (0.44, 160.30)  | 0.158 |
| Unclassified RF39                             | Total score                               | 1.31 (0.26, 6.64)  | 0.742                         | 0.38 (0.07, 2.03)    | 0.256                         | 2.03 (0.20, 21.15)   | 0.553 |
| Akkermansia                                   | Behaviour score                           | 0.62 (0.12, 3.22)  | 0.572                         | 1.87 (0.28, 12.31)   | 0.517                         | 2.41 (0.21, 27.39)   | 0.478 |
| Akkermansia                                   | Drive score                               | 2.75 (0.51, 14.86) | 0.24                          | 1.65 (0.26, 10.31)   | 0.592                         | 1.97 (0.17, 23.52)   | 0.592 |
| Akkermansia                                   | Severity score                            | 3.47 (0.56, 21.35) | 0.18                          | 3.90 (0.49, 30.76)   | 0.196                         | 0.36 (0.02, 5.37)    | 0.457 |
| Akkermansia                                   | Total score                               | 0.64 (0.12, 3.53)  | 0.611                         | 1.50 (0.30, 7.53)    | 0.622                         | 4.28 (0.39, 46.98)   | 0.235 |
| Anaerostipes                                  | Behaviour score                           | 0.44 (0.09, 2.28)  | 0.33                          | 6.00 (0.54, 66.17)   | 0.142                         | 0.38 (0.02, 6.35)    | 0.497 |
| Anaerostipes                                  | Drive score                               | 0.49 (0.09, 2.66)  | 0.408                         | 3.43 (0.52, 22.80)   | 0.202                         | 0.77 (0.06, 9.47)    | 0.835 |
| Anaerostipes                                  | Severity score                            | 1.18 (0.20, 6.93)  | 0.856                         | 6.29 (0.58, 68.42)   | 0.131                         | 0.26 (0.01, 4.97)    | 0.37  |
| Anaerostipes                                  | Total score                               | 0.49 (0.09, 2.66)  | 0.408                         | 2.67 (0.49, 14.46)   | 0.256                         | 1.00 (0.09, 10.92)   | 1     |
| Unclassified Christensenellaceae              | Behaviour score                           | 0.63 (0.13, 3.07)  | 0.562                         | 2.50 (0.34, 18.33)   | 0.367                         | 0.64 (0.05, 7.52)    | 0.64  |
| Unclassified Christensenellaceae              | Drive score                               | 0.38 (0.07, 2.03)  | 0.256                         | 0.88 (0.16, 4.87)    | 0.879                         | 3.81 (0.35, 41.57)   | 0.273 |
| Unclassified Christensenellaceae              | Severity score                            | 0.94 (0.16, 5.46)  | 0.943                         | 1.88 (0.25, 14.08)   | 0.541                         | 0.87 (0.06, 12.44)   | 0.918 |
| Unclassified Christensenellaceae              | Total score                               | 0.38 (0.07, 2.03)  | 0.256                         | 0.88 (0.18, 4.34)    | 0.87                          | 4.00 (0.39, 41.40)   | 0.245 |
| Haemophilus                                   | Behaviour score                           | 1.71 (0.34, 8.68)  | 0.515                         | 2.67 (0.39, 18.17)   | 0.316                         | 0.69 (0.06, 7.59)    | 0.76  |
| Haemophilus                                   | Drive score                               | 0.49 (0.09, 2.66)  | 0.408                         | 3.43 (0.52, 22.80)   | 0.202                         | 0.77 (0.06, 9.47)    | 0.835 |
| Haemophilus                                   | Severity score                            | 0.17 (0.02, 1.68)  | 0.128                         | 0.67 (0.09, 4.99)    | 0.693                         | 16.71 (0.78, 357.48) | 0.072 |
| Haemophilus                                   | Total score                               | 0.49 (0.09, 2.66)  | 0.408                         | 1.71 (0.34, 8.68)    | 0.515                         | 2.04 (0.20, 21.42)   | 0.552 |
| Saccharomyces                                 | Behaviour score                           | 0 (0, NA)          | 0.999                         | INF (0, NA)          | 0.999                         | 1.29 (0, NA)         | 1     |
| Saccharomyces                                 | Drive score                               | 0.64 (0.05, 8.62)  | 0.739                         | 4.50 (0.37, 54.16)   | 0.236                         | 20.22 (0.44, 937.25) | 0.124 |
| Saccharomyces                                 | Severity score                            | 0.83 (0.06, 11.28) | 0.891                         | INF (0, NA)          | 1                             | 0 (0, NA)            | 1     |
| Saccharomyces                                 | Total score                               | 0 (0, NA)          | 0.999                         | 10.00 (0.74, 135.33) | 0.083                         | INF (0, NA)          | 0.999 |
| Candida                                       | Behaviour score                           | 0.09 (0.01, 1.03)  | 0.053                         | 0.06 (0.00, 0.81)    | <b>0.034</b>                  | 7.50 (0.29, 194.11)  | 0.225 |
| Candida                                       | Drive score                               | 1.71 (0.23, 12.89) | 0.601                         | 0 (0, NA)            | 0.999                         | INF (0, NA)          | 0.999 |
| Candida                                       | Severity score                            | 4.29 (0.39, 47.63) | 0.236                         | 0 (0, NA)            | 1                             | INF (0, NA)          | 1     |
| Candida                                       | Total score                               | 0.89 (0.11, 7.02)  | 0.911                         | 0 (0, NA)            | 0.999                         | INF (0, NA)          | 0.999 |
| Mrakia                                        | Behaviour score                           | 0.43 (0.06, 3.22)  | 0.41                          | 0 (0, NA)            | 0.999                         | 2.33 (0, NA)         | 1     |
| Mrakia                                        | Drive score                               | 0.58 (0.08, 4.39)  | 0.601                         | 0 (0, NA)            | 0.999                         | 1.71 (0, NA)         | 1     |
| Mrakia                                        | Severity score                            | 2.25 (0.31, 16.41) | 0.424                         | 0 (0, NA)            | 1                             | 0.44 (0, NA)         | 1     |
| Mrakia                                        | Total score                               | 1.13 (0.14, 8.88)  | 0.911                         | 0 (0, NA)            | 0.999                         | 0.89 (0, NA)         | 1     |
| Unclassified Basidiomycota                    | Behaviour score                           | 3.50 (0.47, 25.90) | 0.22                          | 0.20 (0.02, 2.39)    | 0.203                         | 0.13 (0.00, 4.65)    | 0.264 |
| Unclassified Basidiomycota                    | Drive score                               | 2.50 (0.34, 18.33) | 0.367                         | 0.83 (0.08, 8.24)    | 0.876                         | 0 (0, NA)            | 0.998 |
| Unclassified Basidiomycota                    | Severity score                            | 6.00 (0.54, 66.17) | 0.143                         | 0 (0, NA)            | 1                             | INF (0, NA)          | 1     |
| Unclassified Basidiomycota                    | Total score                               | 4.29 (0.39, 47.63) | 0.236                         | 0.86 (0.09, 8.08)    | 0.893                         | 0 (0, NA)            | 0.998 |
| Unclassified Ascomycota                       | Behaviour score                           | 0.29 (0.04, 2.11)  | 0.22                          | 0.50 (0.06, 4.09)    | 0.518                         | 21.00 (1.12, 393.93) | 0.042 |
| Unclassified Ascomycota                       | Drive score                               | 2.67 (0.39, 18.17) | 0.316                         | 2.67 (0.25, 28.44)   | 0.417                         | 0.68 (0.04, 12.93)   | 0.794 |
| Unclassified Ascomycota                       | Severity score                            | 4.00 (0.55, 29.17) | 0.171                         | 0 (0, NA)            | 1                             | INF (0, NA)          | 1     |
| Unclassified Ascomycota                       | Total score                               | 0.80 (0.11, 6.10)  | 0.83                          | 1.60 (0.17, 15.27)   | 0.683                         | 2.25 (0.11, 46.46)   | 0.6   |
| Unclassified Agaricomycetes                   | Behaviour score                           | 1.17 (0.17, 8.09)  | 0.876                         | 0 (0, NA)            | 0.999                         | 0.86 (0.00, NA)      | 1     |
| Unclassified Agaricomycetes                   | Drive score                               | 0.58 (0.08, 4.39)  | 0.601                         | 0 (0, NA)            | 0.999                         | 1.71 (0, NA)         | 1     |
| Unclassified Agaricomycetes                   | Severity score                            | 0.23 (0.02, 2.59)  | 0.236                         | 0 (0, NA)            | 1                             | 4.29 (0, NA)         | 1     |
| Unclassified Agaricomycetes                   | Total score                               | 1.13 (0.14, 8.88)  | 0.911                         | 0 (0, NA)            | 0.999                         | 0.89 (0, NA)         | 1     |

INF: infinite value; NA: not available.
